# Supplementary material
Source: PubMed Central journal article supplement (PMC2785874)

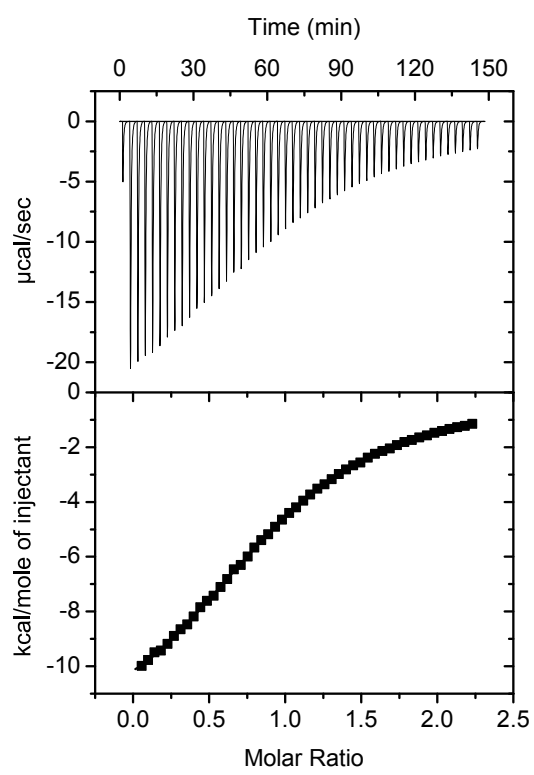

Supplement: NIHMS149246-supplement-02.pdf [file NIHMS149246-supplement-02.pdf]
